# Supplementary material for: Electrochemistry of layered GaSe and GeS: applications to ORR, OER and HER
Source: Royal Society of Chemistry journal article supplement (doi:10.1039/c5cp06682d), 2015-12-17
Supplement: c5cp06682d1.pdf [file c5cp06682d1.pdf]

# Electrochemistry of layered GaSe and GeS: applications to ORR, OER and HER

*Shu Min Tan,<sup>a,†</sup> Chun Kiang Chua,<sup>a,†</sup>, David Sedmidubský,<sup>b</sup> Zdeněk Sofer<sup>b</sup> and Martin Pumera<sup>a\*</sup>*

<sup>a</sup> School of Physical and Mathematical Science, Division of Chemistry and Biological Chemistry, Nanyang Technological University, 21 Nanyang Link, Singapore 637371.

<sup>b</sup> University of Chemistry and Technology Prague, Department of Inorganic Chemistry, Technická 5, 166 28 Prague 6, Czech Republic.).

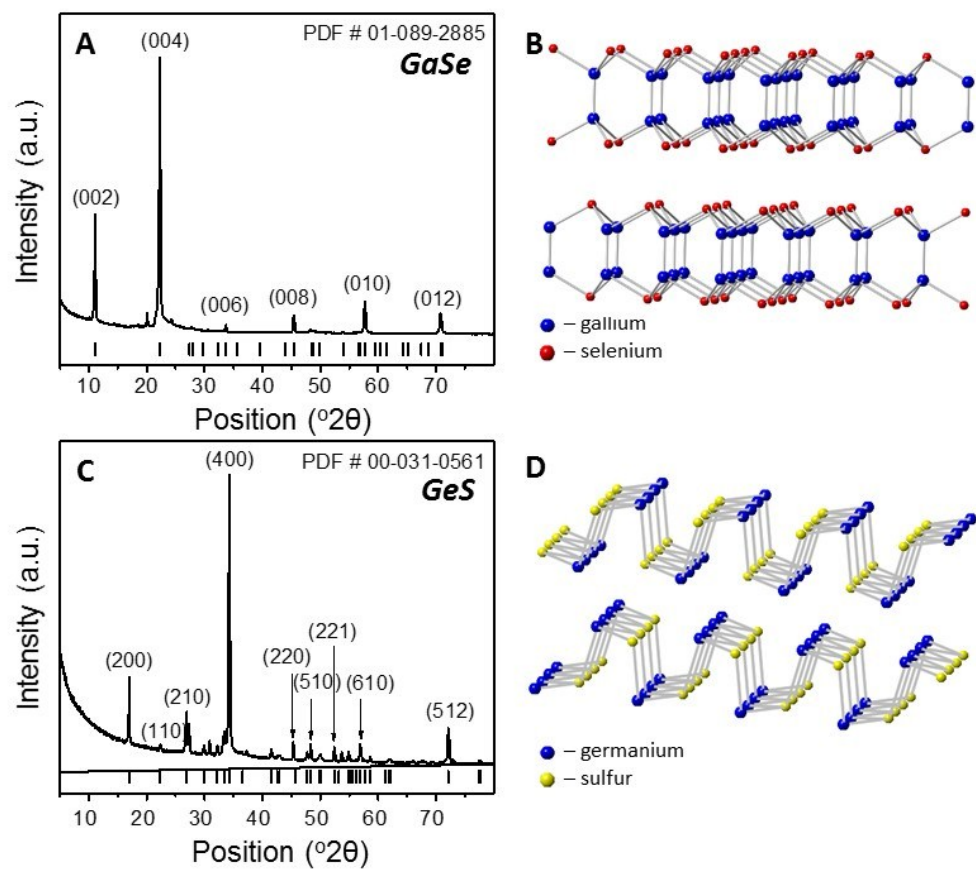

**Figure S1** The X-ray diffraction patterns together with the corresponding structures of (A and B) *GaSe* and (C and D) *GeS*.

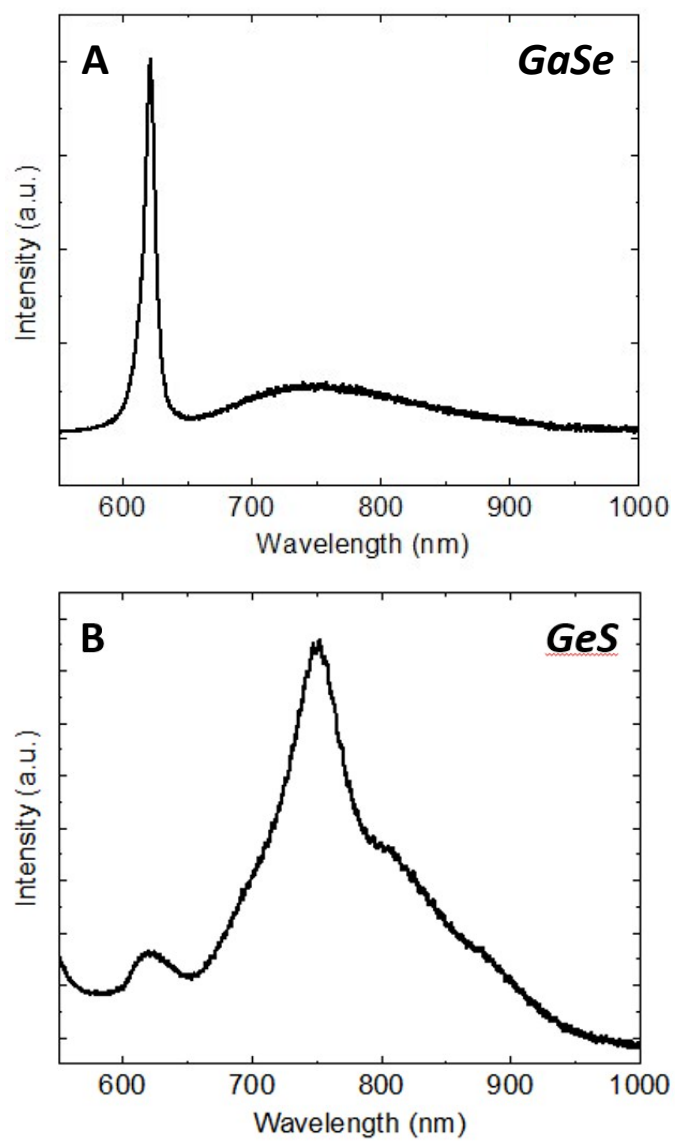

**Figure S2** Photoluminescence spectra of (A) GaSe and (B) GeS.

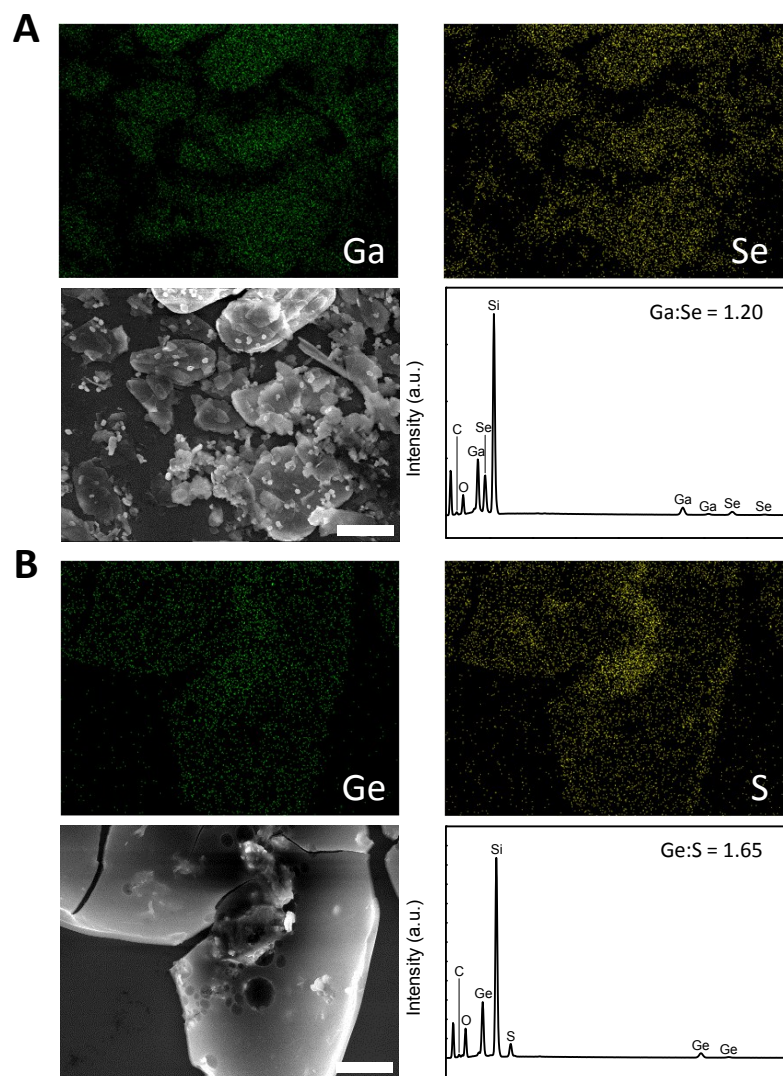

**Figure S3** EDS mappings and elemental spectra of **(A)** GaSe and **(B)** GeS. The M:X ratios obtained from EDS are displayed. Scale bar represents 10  $\mu\text{m}$ .

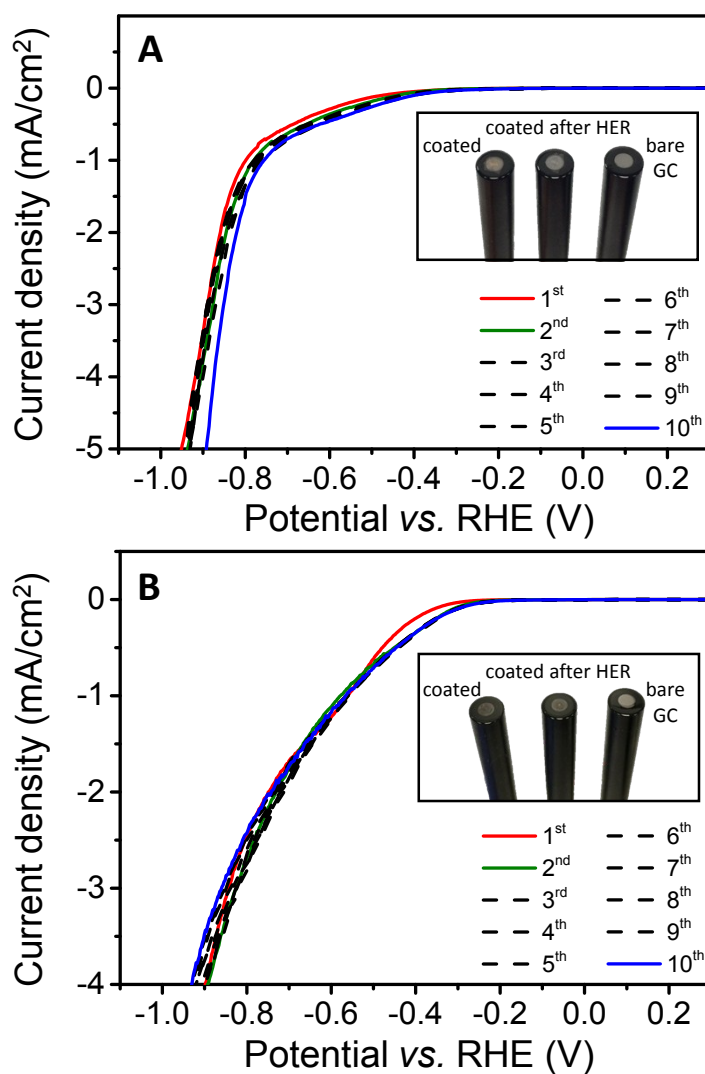

**Figure S4** Ten repeated linear sweep voltammograms of hydrogen evolution reaction on (A) GaSe and (B) GeS.

Conditions: scan rate of  $2 \text{ mV s}^{-1}$ ,  $0.5 \text{ M H}_2\text{SO}_4$  as supporting electrolyte. (Insets) GC electrodes with various coatings of GaSe or GeS: (from left to right) material-modified, material-modified followed by HER measurements and then dried, and bare.

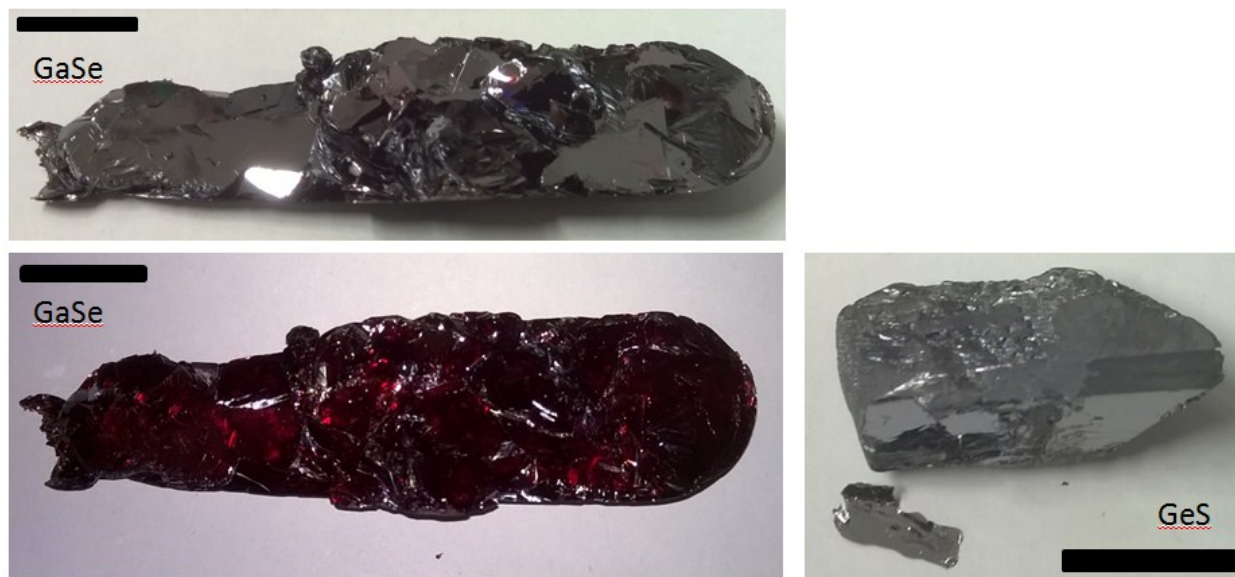

**Figure S5** The crystals of GaSe and GeS obtained by slow cooling of reaction mixture in quartz ampoule. The scale bar corresponds to 10 mm.
